# Supplementary material
Source: PubMed Central journal article supplement (PMC5007619)

## Legend

### Supplemental Figure 1:

Purification and quantification of full-length p300 and CBP. A) Full-length p300 appears as a clean doublet and was quantified relative to a BSA standard curve. B) Similar to (A) but for full-length CBP.

# Supplemental Figure 1

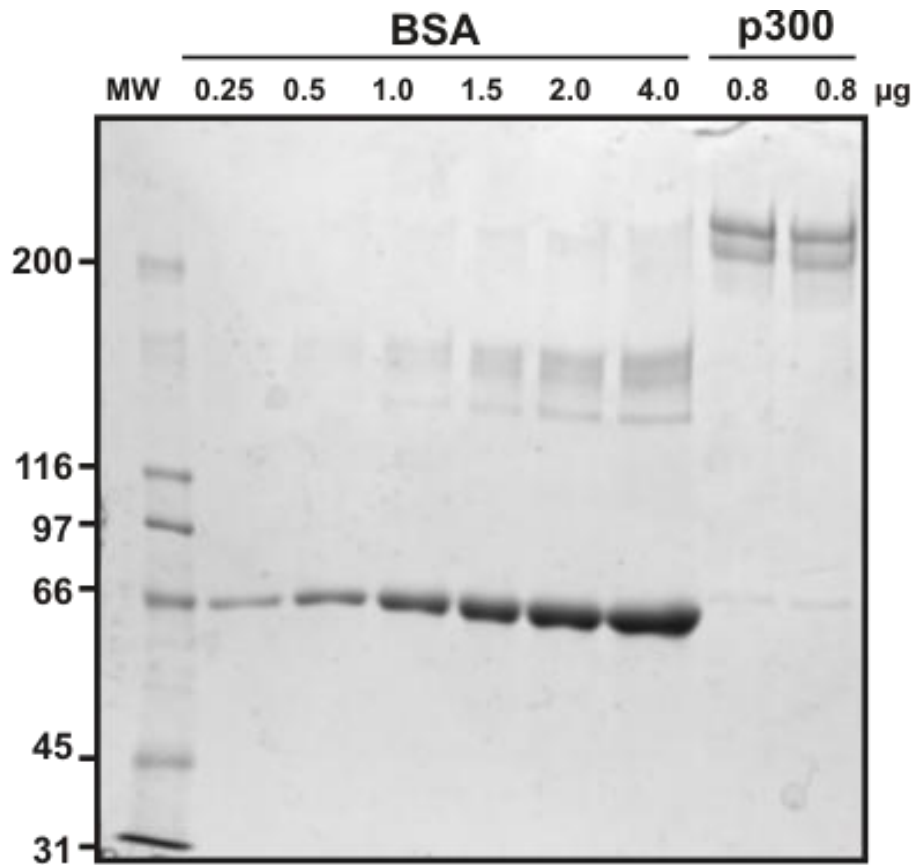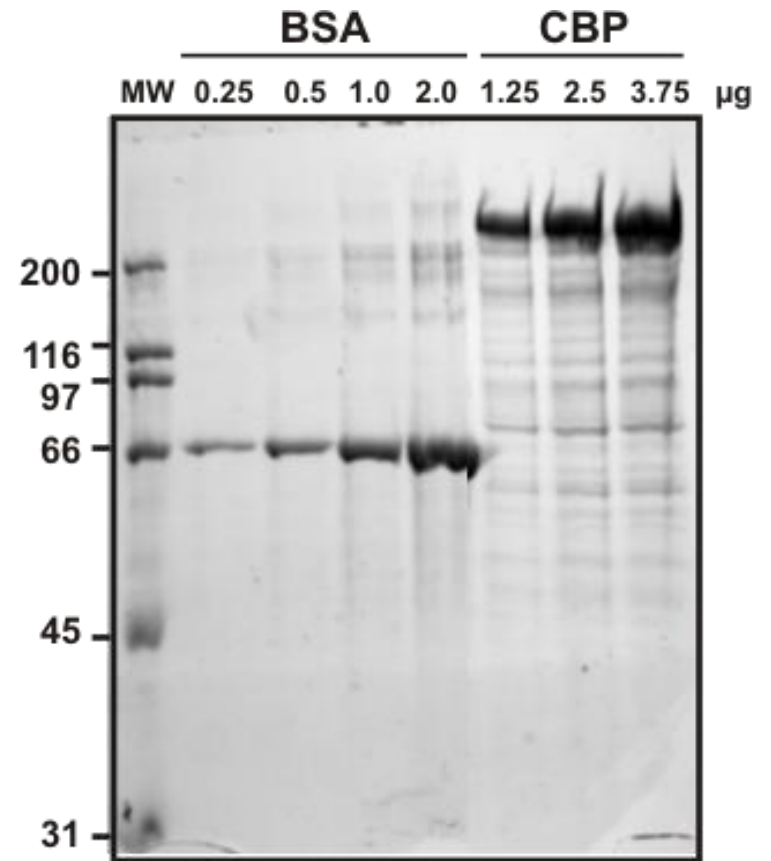

Supplement: NIHMS812506-supplement-Supp1.pdf [file NIHMS812506-supplement-Supp1.pdf]
